# Supplementary material
Source: PubMed Central journal article supplement (PMC6910962)

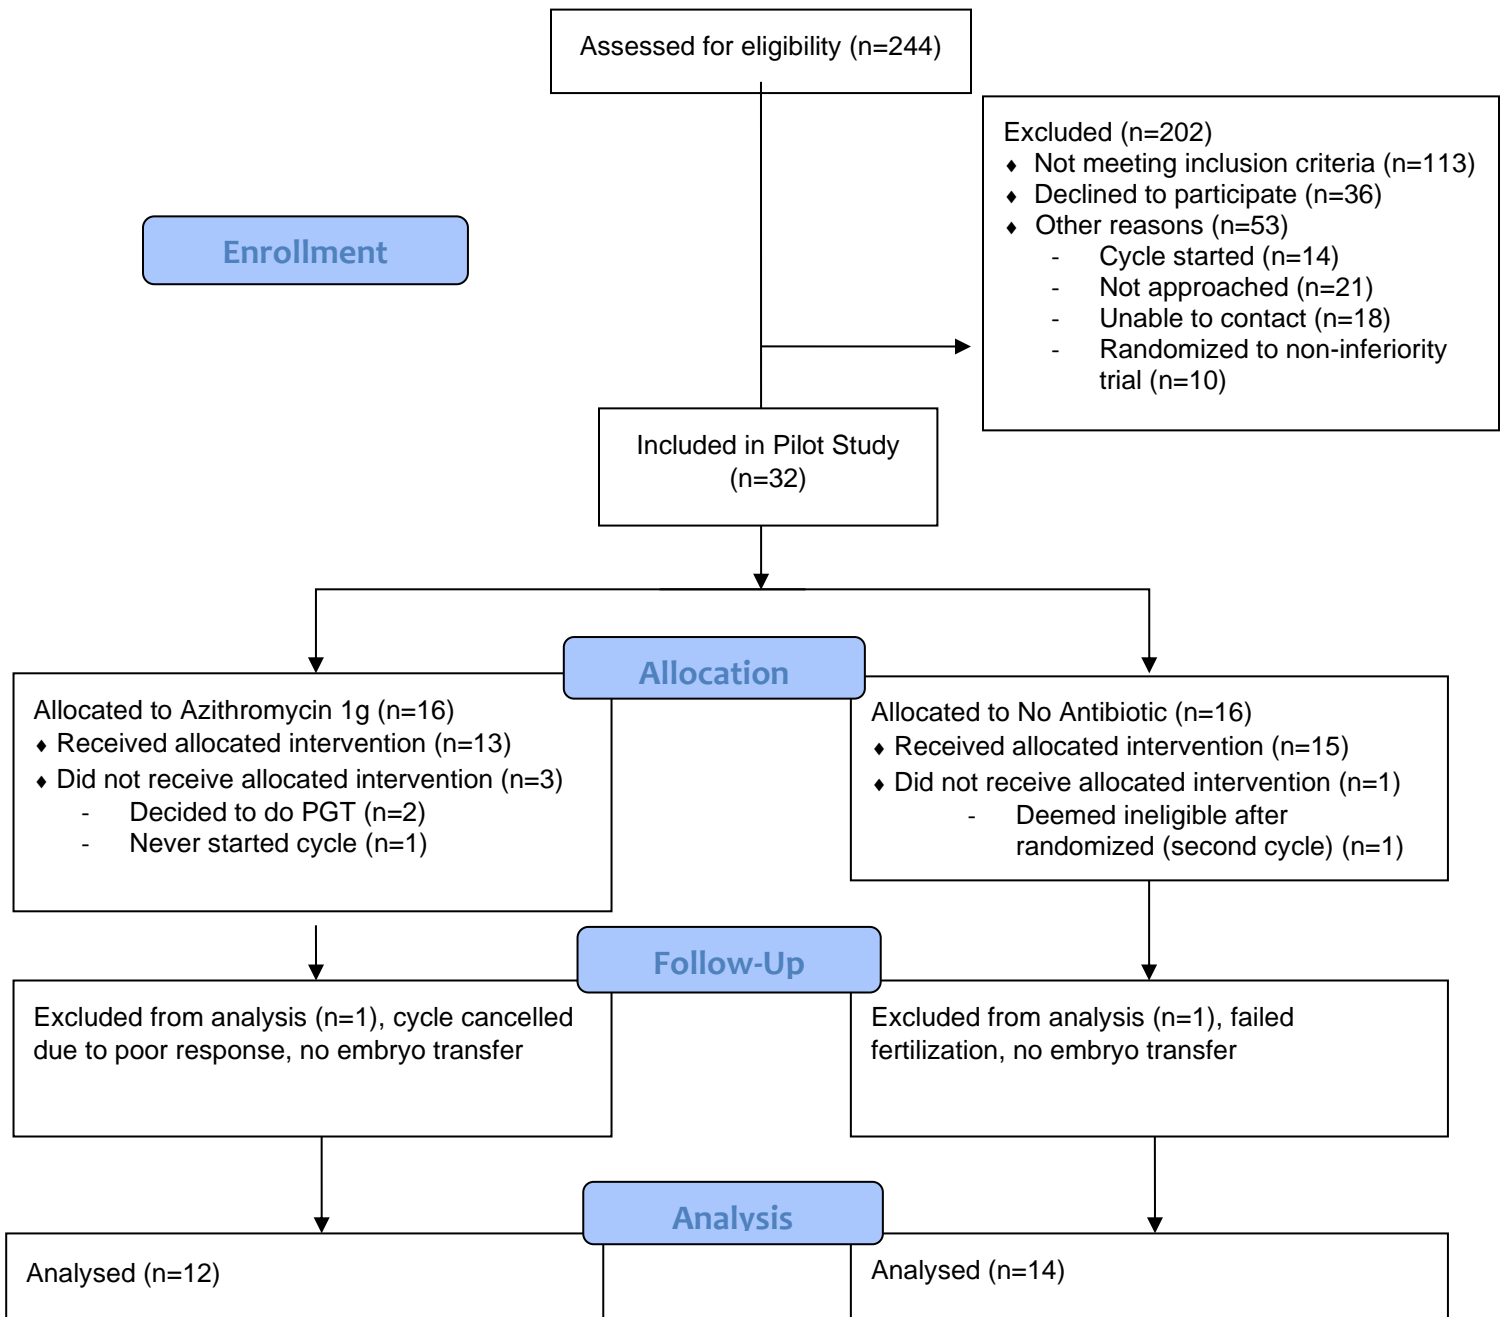

**Figure S1.** STROBE flow diagram.

Supplement: NIHMS1050875-supplement-Supp_figS1.pdf [file NIHMS1050875-supplement-Supp_figS1.pdf]
